# Supplementary material
Source: PubMed Central journal article supplement (PMC3128754)
Supplement: Supp_Data.pdf [file Supp_Data.pdf]

## Supplementary Data

SUPPLEMENTARY TABLE S1. PRIMERS USED FOR REAL-TIME-POLYMERASE CHAIN REACTION

| Gene          | Primer sequence                                                              | Sequence ID | Product size (bp) |
|---------------|------------------------------------------------------------------------------|-------------|-------------------|
| 18S RNA       | Forward: 5'-ggaagggcaccaccaggagt-3'<br>Reverse: 5'-tgagccccggacatctaag-3'    | NR_003278   | 317               |
| MyoCD         | Forward: 5'-gtgggcccagcatttcaac-3'<br>Reverse: 5'-ttccggatcgtgcttctc-3'      | NM_145136   | 156               |
| $\alpha$ -SMA | Forward: 5'-ggcatccacgaaccacat-3'<br>Reverse: 5'-agccaccgatccagacagagta-3'   | NM_007392   | 214               |
| SMMHC         | Forward: 5'-atgctgggaagggtggactaca-3'<br>Reverse: 5'-gtcgggaacatgcctttt-3'   | NM_013607   | 216               |
| KLF4          | Forward: 5'-agcgtacaatcatggtcaagt-3'<br>Reverse: 5'-gtaagtccggcatgttcaagt-3' | NM_004235   | 221               |
| OCT3/4        | Forward: 5'-gaaggtattcagccaacga-3'<br>Reverse: 5'-aaattctccaggttgctct-3'     | NM_013633   | 216               |
| AFP           | Forward: 5'-ggcctctccagaaactagg-3'<br>Reverse: 5'-ccacaggccaatagtgttc-3'     | NM_007423   | 170               |
| GATA2         | Forward: 5'-agacgacaaccaccaccta-3'<br>Reverse: 5'-atgcacttgacagctcctc-3'     | NM_008090   | 205               |
| NeuroD1       | Forward: 5'-cttcaaacgaaccatcc-3'<br>Reverse: 5'-aactgacgtgctctaatcg-3'       | NM_010894   | 237               |

MyoCD, myocardin;  $\alpha$ -SMA,  $\alpha$ -smooth muscle actin; SMMHC, smooth muscle myosin heavy chain; KLF4, Kruppel-like factor 4. OCT3/4, octamer-binding protein 3/4; AFP, alpha-fetoprotein; GATA2, GATA binding protein 2.

SUPPLEMENTARY TABLE S2. PRIMERS USED FOR KRUPPEL-LIKE FACTOR 4 3' UNTRANSLATED REGION CLONING

| Gene              | Primer sequence                                                                                                  |
|-------------------|------------------------------------------------------------------------------------------------------------------|
| KLF4 WT 3'UTR     | Forward: 5'-ggaggacgactatcccacgtagtggatgta-3'<br>Reverse: 5'-ggaggaagcttctatttctcacttgagtatgc-3'                 |
| KLF4 Mutant 3'UTR | Forward: 5'-ctggatggatcttctatcataggtataccaatccaactg-3'<br>Reverse: 5'-caagttggatttggtatacctatgataagatccatccag-3' |

KLF4, kruppel-like factor 4; WT, wild type; 3'UTR, 3' untranslated region.

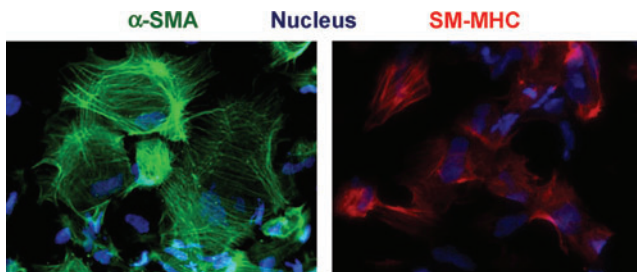

**SUPPLEMENTARY FIG. S1.** Representative figures with immunofluorescence staining in the derived cell population treated with 10  $\mu$ M RA for 8 days. (Left panel)  $\alpha$ -SMA stained with green and (right panel) SMMHC with red overlapped with blue stained nuclei.  $\alpha$ -SMA,  $\alpha$ -smooth muscle actin; SMMHC, smooth muscle myosin heavy chain.

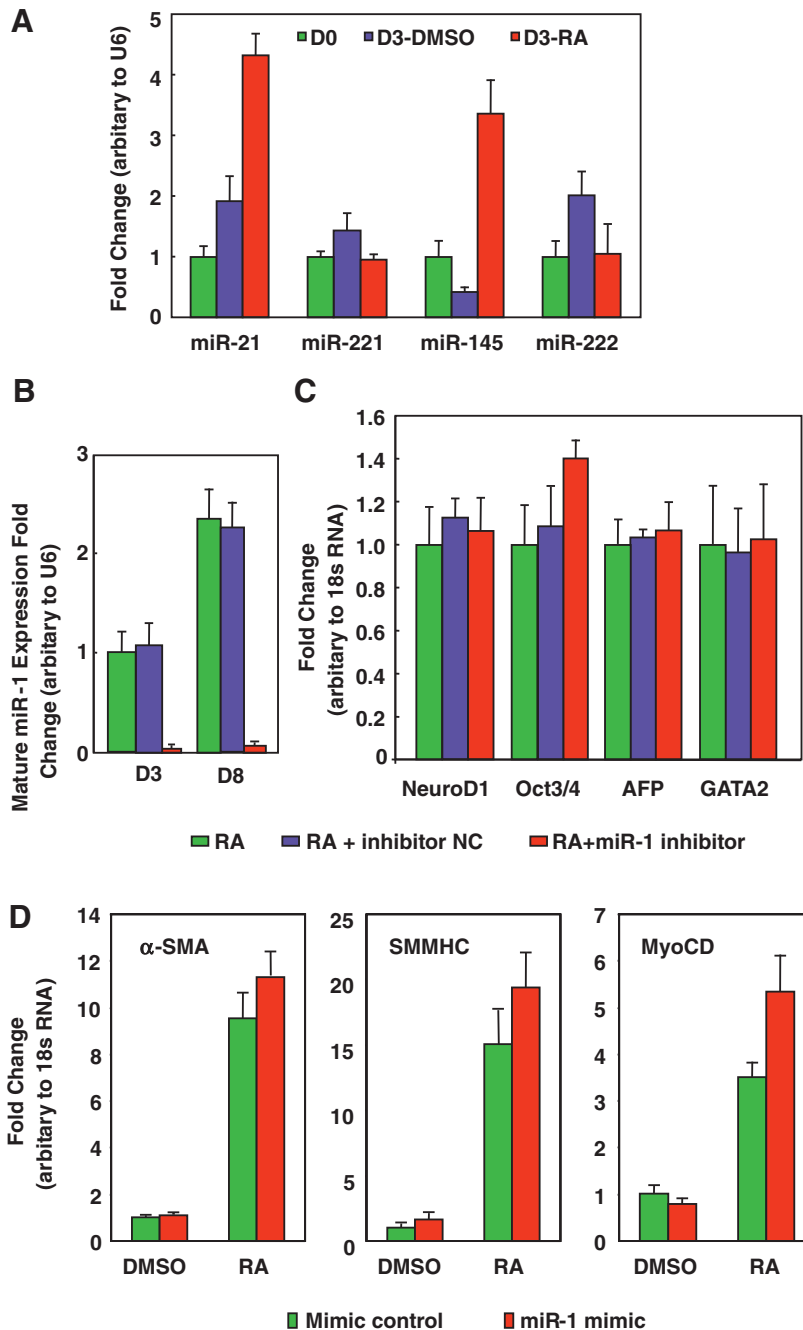

**SUPPLEMENTARY FIG. S2.** (A) miR-21, 221, 145, and 222 expression during RA-induced SMC from ESC cultured for 0, 3, 6, or 9 days, at which time miR-1 were measured by quantitative real time PCR (qRT-PCR) and normalized to U6. Fold changes are shown with respect to DMSO-treated cells, where miR-1 levels on day 0 were set to a value of 1. (B) miR-1 upregulation could be repressed by miR-1 inhibitor. miR-1 inhibitor (50 nM) or inhibitor NC were transfected into mouse ESCs after RA treatment for 1 day. Cells were continuously cultured in RA-containing differentiating medium for the indicated days. miR-1 expression was measured with TaqMan RT-PCR at the indicated days. Fold changes are shown with respect to DMSO-treated cells, where miR-1 levels on day 0 were set to a value of 1. (C) miR-1 inhibitor had no effect on cell-lineage markers, including NeuroD1, AFP, and GATA2, though this inhibition can slightly upregulate OCT3/4 expression on day 6 of ESC/SMC differentiation. Fold changes are shown with respect to inhibitor NC, where the individual gene expression levels were set to a value of 1. (D) miR-1 mimic alone cannot enhance SMC differentiation in *Dicer*<sup>-/-</sup> ESCs, as evidenced by expression of SMC-specific markers, including  $\alpha$ -SMA, SMMHC, and MyoCD with qRT-PCR. *N* = 4. miR-1, microRNA-1; RA, retinoic acid; SMC, smooth muscle cell; ESC, embryonic stem cell; DMSO, dimethyl sulfoxide; NC, negative control; PCR, polymerase chain reaction. OCT3/4, octamer-binding protein 3/4; AFP, alpha-fetoprotein; GATA2, GATA binding protein 2.

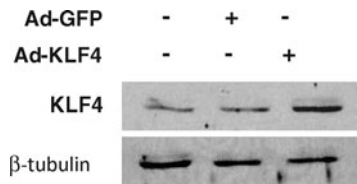

**SUPPLEMENTARY FIG. S3.** Mouse ESCs were infected with adenovirus expressing KLF4 (Ad-KLF4) during differentiate into SMCs with RA. The derived cells were subject to Western blot analysis and expression of KLF4 was detected in extracts from cells differentiated for 6 days. β-tubulin served as internal control. KLF4, Kruppel-like factor 4. Ad-KLF4, adenovirus expressing KLF4; Ad-GFP, adenovirus expressing green fluorescence protein.

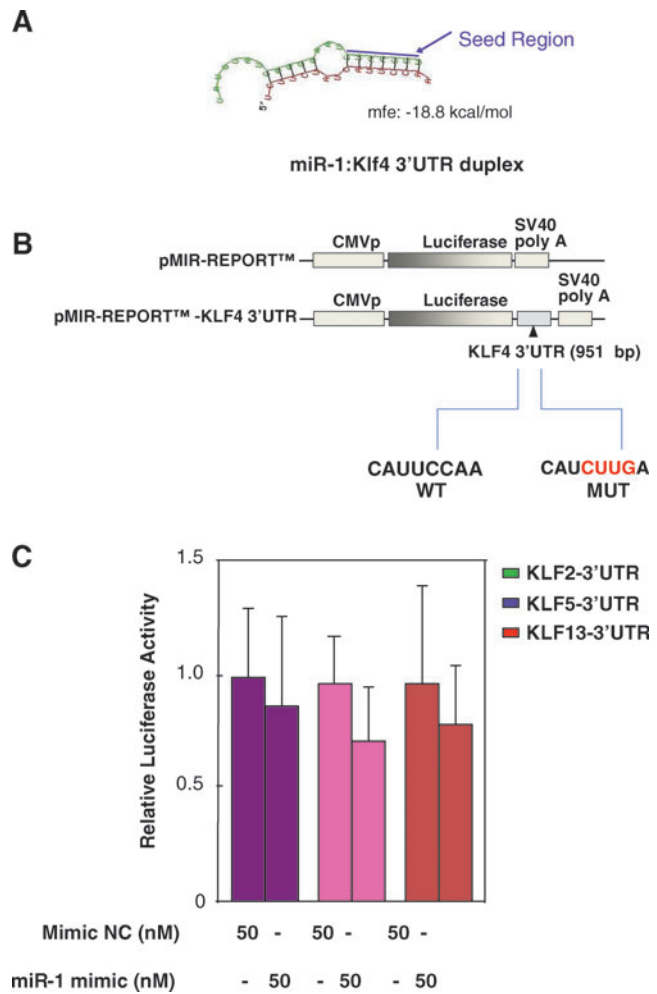

**SUPPLEMENTARY FIG. S4.** (A) Predicted folding structure from mFOLD between miR-1 (green) and the Klf4 (red). The mfe is indicated, and the seed region is shown by the purple line and arrow. (B) Schematic for generation of luciferase reporter plasmids containing KLF4 3'UTR downstream of the luciferase reporter gene (WT) and the mutant miR-1 binding site controls. (C) KLF2, KLF5, and KLF13 3'UTR-luciferase reporter constructs were co-transfected into HEK 293 cells with miR mimic or mimic NC as indicated. Individual luciferase activity was normalized to the responding thymidine kinase (TK) promoter-*Renilla*-luciferase activity. Relative luciferase activities were expressed as mean ± standard deviation. Data shown are representative samples from at least 3 independent experiments, each done in triplicates. mfe, minimal free energy; WT, wild type; 3'UTR, 3' untranslated region.
